# Supplementary material for: Stimulation of Host Immune Defenses by a Small Molecule Protects C. elegans from Bacterial Infection
Source: PLoS Genet. 2012 Jun 14;8(6):e1002733. doi: 10.1371/journal.pgen.1002733 (PMC3375230; doi:10.1371/journal.pgen.1002733)
Supplement: Table S1 — Differentially expressed genes following RPW-24 treatment identified in a genome-wide transcriptional profiling experiment. Presented are the lists of Affymetrix probe sets, the corresponding gene names, the fold change and the P value for all probe sets whose expression changed more than three-fold (P<0.025) in wild-type nematodes exposed to RPW-24 versus DMSO. A summary of the data is presented at the bottom of the worksheet. (XLSX) [file pgen.1002733.s006.xlsx]

## Sheet: Sheet1
Affymetrix ID	Gene Name	Gene Symbol	Description	DMSO value	RPW-24 value	Fold change	P value
189304_at	K09D9.2	cyp-35A3	Cytochrome P450 family	7.26	27722.4	3818.51	0.000860876
189282_at	C06B3.3	cyp-35C1	Cytochrome P450 family	6.76	16192	2395.27	0.00398235
189256_at	K07C6.3	cyp-35B2	Cytochrome P450 family	4.39	7295.68	1661.89	0.00293415
189394_at	K07C6.5	cyp-35A5	Cytochrome P450 family	4.64	6644.3	1431.96	0.00310248
181132_s_at	F49F1.7		ShK-like toxin	5.39	7224.34	1340.32	0.00618565
183052_at	C32H11.1		CUB-like domain	9.45	10719.6	1134.35	0.0132114
188882_at	R08H2.1	dhs-23		4.5	4137.08	919.351	0.00107202
184059_at	F59A7.1	clec-206	C-type lectin	4.53	3928.9	867.307	0.00129646
189283_s_at	C06B3.3	cyp-35C1	Cytochrome P450 family	27.54	23015.4	835.709	0.00343806
172635_x_at	Y38E10A.15	nspe-7		4.64	3734.66	804.884	6.27889e-05
191418_at	ZC443.6	ugt-16	UDP-glucuronosyltransferase	4.79	3711.63	774.871	0.00248929
185525_at	C03G6.14	cyp-35A1	Cytochrome P450 family	4.39	3093.29	704.622	0.00114999
191071_at	ZK697.6	gst-21	Glutathione s-transferase	10.83	6390.5	590.074	8.63913e-05
178563_at	T16G1.6		Predicted small molecule kinase	8.13	3663.74	450.645	0.00209255
189398_at	K07C6.2	cyp-35B3	Cytochrome P450 family	4.39	1635.3	372.506	0.000366064
191776_at	T19H12.1	ugt-9	UDP-glucuronosyl transferase	8.34	3045.2	365.132	0.00746251
188934_at	H23N18.1	ugt-13	UDP-glucuronosyl transferase	14.24	3552.22	249.454	1.23839e-05
178316_at	C29F7.2		Predicted small molecule kinase	43.23	9750.05	225.539	0.00365702
188995_at	H23N18.4		UDP-glucuronosyl transferase	4.44	990.47	223.079	0.000620615
180925_at	F49F1.1		ShK-like toxin	27.79	6139.38	220.92	3.58326e-05
189512_at	C03G6.15	cyp-35A2	Cytochrome P450 family	65.37	12420.3	190.001	0.000244615
186726_at	Y38E10A.13	nspe-1		5.47	950.58	173.781	4.84078e-05
188962_at	H23N18.3	ugt-8	UDP-glucuronosyl transferase	4.42	733.6	165.973	5.18228e-06
179695_at	F35E12.5		CUB-like domain	73.25	11898.1	162.431	0.0103887
172184_x_at	Y46C8AL.2	clec-174	CUB-like domain	27.34	4401.5	160.991	0.00803105
178843_at	F08G5.6		CUB-like domain	149.47	23981.2	160.442	0.00050127
191466_at	C35A5.2	ugt-33	UDP-glucuronosyl transferase	4.52	721.59	159.644	0.00393731
191251_at	C33A12.6	ugt-21	UDP-glucuronosyltransferase	30.58	4767.69	155.909	0.00392979
189366_at	K07G6.4	cyp-35B1	Cytochrome P450 family	12.27	1848.84	150.68	0.0158956
192820_at	R03D7.6	gst-5	Glutathione s-transferase	173.77	24526.7	141.145	3.01044e-07
186815_s_at	E02C12.10		Predicted small molecule kinase	4.39	567.02	129.162	0.0089259
186815_s_at	E02C12.11		Predicted small molecule kinase	4.39	567.02	129.162	0.0089259
177487_at	C29F3.7		CUB-like domain	94.23	11631.9	123.442	0.000435073
182733_at	C31A11.5	oac-6	Acyltransferase	6.57	792.63	120.644	0.0145708
188224_s_at	C52A10.2		Carboxylesterase	4.39	484.39	110.339	0.00587989
178355_at	C29F7.1		Predicted small molecule kinase	30.65	3143.18	102.551	0.0129812
190849_at	F10D2.11	ugt-41	UDP-glucuronosyl transferase	22.55	2160.37	95.804	0.00157682
185145_at	Y46D2A.2		DUF274	5.66	519.9	91.855	0.00141497
183702_at	K05B2.4		Acyl-CoA thioesterase	11.12	1021.09	91.825	2.65973e-05
190879_at	AC3.7	ugt-1	UDP-glucuronosyl transferase	41.23	3665.13	88.895	0.000273493
179214_at	F54B8.4			29.55	2609.41	88.305	0.00151149
191611_at	F35E8.11	cdr-1	Glutathione s-transferase	8.39	738.91	88.07	0.000613245
172744_at	K11G9.6	mtl-1	Metalothionein	133.32	11437.1	85.787	0.00207852
183009_at	Y38F1A.8			14.84	1263.92	85.17	1.47769e-07
187028_s_at	C33E10.10		Predicted dehydrogenase	4.39	337.38	76.852	0.00553404
187028_s_at	T25G12.2			4.39	337.38	76.852	0.00553404
193849_at	F13D11.4			5.31	375.15	70.65	0.00165962
184602_at	C10H11.3	ugt-25	UDP-glucuronosyl transferase	7.75	542.21	69.963	0.00259281
190002_at	C33C12.8		Glucosylceramidase	6.48	409.56	63.204	0.0028892
189430_at	C12D5.7	cyp-33A1	Cytochrome P450 family	279.76	17435.2	62.322	0.000494949
179511_at	F20G2.5		CUB-like domain	4.49	278.53	62.033	0.0142778
176851_at	Y40B10A.6		Methyltransferase	26.72	1541.11	57.676	0.00017462
191871_s_at	K01D12.11	cdr-4	Glutathione s-transferase	113.93	6371.7	55.926	0.00279212
181334_s_at	C27H5.4			71.46	3913.16	54.76	0.00181493
189025_at	D2063.1		Alcohol dehydrogenase	4.6	251.52	54.678	0.00150165
189564_s_at	B0238.1			16.13	847.04	52.513	0.00188238
185902_at	F21C10.9			70.11	3651.88	52.088	0.00355462
188217_at	Y80D3A.7	ptr-22	Sterol-sensing receptor	4.39	220.15	50.148	0.000780299
177544_at	F58E6.7			4.39	204.89	46.672	0.00706105
185864_at	K11D12.3	srr-4	Serpentine Receptor	11.13	512.93	46.085	0.00132552
180973_at	F49F1.6			5.64	243.59	43.19	0.00676684
171941_s_at	F44E5.4			54.3	2318.07	42.69	0.000164197
177701_s_at	K08D8.6			130.14	5176.26	39.775	6.90187e-05
190958_s_at	F44E5.4			96.53	3821.5	39.589	0.0024959
189494_at	Y38C9B.1	cyp-29A3	CYtochrome P450 family	4.39	172.44	39.28	0.000556697
187412_at	C18H9.6			173.05	6757.64	39.05	0.000185063
178425_at	K08D8.6			69.28	2698.76	38.954	0.00409435
184733_at	T06C12.10	cgt-1	Ceramide Glucosyl Transferase	4.96	186.14	37.528	0.0139243
188031_s_at	K07E3.8	vem-1	VEMA (mammalian ventral midline antigen) related	389.27	14420.6	37.045	5.85597e-05
181715_s_at	T19B10.2			91.53	3342.99	36.523	0.000382567
177700_at	K08D8.6			189.06	6378.44	33.738	0.000109008
190318_at	R05D8.9			4.39	145.31	33.1	0.00254993
181714_at	T19B10.2			175.71	5618.55	31.976	2.57643e-05
191066_s_at	ZC455.6	ugt-5	UDP-GlucuronosylTransferase	70.72	2243.38	31.722	0.000481222
183526_at	C14C6.5			68.91	2177.43	31.598	0.0137658
183703_s_at	Y43D4A.2	ugt-22	UDP-GlucuronosylTransferase	338.69	10406.4	30.726	0.00059287
189457_at	B0213.15	cyp-34A9	CYtochrome P450 family	38.22	1139.13	29.805	0.0214512
189525_s_at	F13H6.3			284.94	8410.03	29.515	0.000237906
188618_at	Y46H3D.6	nhr-237	Nuclear Hormone Receptor family	16.97	468.4	27.602	0.0010372
189218_at	R04D3.1	cyp-14A4	CYtochrome P450 family	4.39	121.16	27.599	0.00755688
179778_at	F27D9.2			36.25	991.96	27.364	0.000383361
185210_s_at	K11D12.5			250.81	6561.66	26.162	1.1459e-05
193604_at	C08F11.8	ugt-22	UDP-GlucuronosylTransferase	454.69	11413.1	25.101	2.6822e-08
180412_at	R05H10.1			16.68	418.27	25.076	0.00343598
193924_at	ZK455.7	pgp-3	P-GlycoProtein related	48.42	1206.42	24.916	0.00167598
192956_at	F11G11.3	gst-6	Glutathione S-Transferase	13.33	329.75	24.737	0.0152511
179688_at	T13B5.5			11.14	257.41	23.107	0.0246229
189087_s_at	T27E4.2	hsp-16.1	Heat Shock Protein	47.5	1083.82	22.817	0.010421
189087_s_at	T27E4.8	hsp-16.11	Heat Shock Protein	47.5	1083.82	22.817	0.010421
175307_s_at	W01B11.6			189.89	3963.59	20.873	0.0016892
192497_at	R04B5.3	nhr-205	Nuclear Hormone Receptor family	6.63	137.87	20.795	3.34697e-05
181565_at	F56D6.2	clec-67	C-type LECtin	87.36	1684.86	19.286	0.00184942
176743_s_at	F56D6.15	clec-69	C-type LECtin	69.75	1343.78	19.266	0.00487365
188128_at	C50B6.7			233.93	4473.31	19.122	0.00181976
191020_at	T18D3.3			8.51	161.37	18.962	0.0074877
172628_x_at	Y38E10A.16			4.48	82.57	18.431	0.00214362
172220_x_at	C37A5.4			7.68	137.93	17.96	0.00156994
183527_s_at	C14C6.5			162.09	2877.31	17.751	0.0111195
186996_at	Y73C8C.10			8.33	144.16	17.306	0.000670302
189735_at	F52E1.7	hsp-17	Heat Shock Protein	254.11	4350.68	17.121	6.75345e-05
175993_at	C29E4.7			189.85	3193.55	16.821	0.00383755
178571_s_at	C37A5.4			12.86	213.24	16.582	0.000107953
180592_s_at	Y19D10A.9			1091.68	18060.7	16.544	3.89125e-07
193056_s_at	E03G2.2	mrp-3	Multidrug Resistance Protein family	114.84	1831.53	15.949	1.39249e-05
190744_at	C04F5.7	ugt-63	UDP-GlucuronosylTransferase	9.61	149.84	15.592	0.000251235
187493_at	T28D9.3			108.6	1337.36	12.315	3.33703e-05
189667_at	C34B7.3	cyp-36A1	CYtochrome P450 family	18.63	226.64	12.165	0.00343633
192603_at	C33G8.6	nhr-42	Nuclear Hormone Receptor family	45.7	555.87	12.163	0.000233913
176845_s_at	F56A4.9			4.81	58.47	12.156	0.011937
179806_at	W05H9.1			760.14	9197.46	12.1	0.000620751
175449_s_at	Y38E10A.14			9.66	115.12	11.917	0.00642652
189646_at	K09C4.5			74.85	886.08	11.838	0.000118448
186820_at	E02C12.12			4.45	52.4	11.775	0.0232729
177829_at	F14E5.5			92.57	1078.38	11.649	5.01548e-06
186182_s_at	R02E12.6			116.1	1339.39	11.537	0.000620866
175175_at	F10E9.12			28.49	326.88	11.473	0.00384973
176044_at	Y41D4B.16			52.44	589.57	11.243	0.00283479
177798_at	F10C2.3			56.31	631.62	11.217	0.00147378
189350_at	T19B10.1	cyp-29A2	CYtochrome P450 family	95.23	1066.13	11.195	0.000909186
184144_at	R193.2			51.42	575.36	11.189	0.000764157
180204_at	F35E12.9			38	408.14	10.741	0.000507386
190585_at	ZK970.7			42.39	452	10.663	0.00461313
177038_at	Y94H6A.7			866.07	9190.85	10.612	0.00213374
182849_at	Y37A1B.5			167.1	1770.88	10.598	0.00029371
189019_at	C31E10.7			1218.18	12858.1	10.555	0.000382704
175235_at	F08H9.6	clec-57	C-type LECtin	31.87	328	10.292	0.00285937
178464_at	R193.2			28.39	292.11	10.289	0.000221295
177833_s_at	F19B2.5			180.71	1825.24	10.1	0.000202116
193272_s_at	F15B9.1	far-3	Fatty Acid/Retinol binding protein	430.59	4278.85	9.937	0.0117824
174404_s_at	F14E5.5			64.33	634.71	9.866	8.07586e-06
193592_s_at	T01G5.1		tyrosine-protein kinase	10.24	98.69	9.638	0.000868213
173620_s_at	C03A7.11	ugt-51	UDP-GlucuronosylTransferase	29.12	278.48	9.563	8.55384e-06
179525_at	F36H1.5			9.41	87.65	9.315	0.00139961
190619_at	C15C8.3			1235.64	11232.8	9.091	0.00444397
190620_s_at	T08B1.3	alh-5	ALdehyde deHydrogenase	31.65	285	9.005	0.00231945
177903_s_at	F09B9.1			10.15	88.64	8.733	0.00471724
191205_s_at	C33G8.11	nhr-107	Nuclear Hormone Receptor family	16.32	142.08	8.706	0.00358178
185153_s_at	F35E12.10			1273.31	11078.1	8.7	0.00136715
172790_x_at	F02C12.5	cyp-13B1	CYtochrome P450 family	33.08	282.61	8.543	0.0143691
173676_s_at	F08C6.6			690.48	5830.11	8.444	0.000849494
174023_at	ZC410.1	nhr-11	Nuclear Hormone Receptor family	5.97	49.93	8.363	0.00493016
183263_s_at	F59B1.8			90.13	753.42	8.359	0.00459755
189405_at	F14H3.10	cyp-35D1	CYtochrome P450 family	45.96	383.09	8.335	0.000270368
173232_s_at	C05D9.2	lmp-2	LAMP (lysosome-associated membrane protein) homolog	49.88	415.38	8.328	0.0164697
180453_at	F53A9.1			205.71	1698.51	8.257	0.000234889
185599_s_at	F02C12.5	cyp-13B1	CYtochrome P450 family	14.9	121.98	8.187	0.0203496
182341_at	C05D9.2	lmp-2	LAMP (lysosome-associated membrane protein) homolog	61.25	498.39	8.137	0.00575309
174012_s_at	F53B2.8			118.41	948.96	8.014	0.000195955
183028_s_at	Y22F5A.5	lys-2		1680.53	13385.1	7.965	0.0042472
174467_s_at	Y73C8B.3			84.48	672.25	7.958	2.24308e-05
188980_at	H23N18.2	ugt-14	UDP-GlucuronosylTransferase	5.63	44.8	7.957	0.000383098
189160_at	ZK896.7			564.48	4487.16	7.949	0.00044683
180747_s_at	K02D7.4	dsc-4	Defecation Suppressor of Clk-1	297.56	2322.58	7.805	1.02361e-05
180909_at	C32H11.4			6.65	51.8	7.789	0.00399949
189922_at	F08H9.6	clec-57		20.53	159.5	7.769	0.000368849
193486_at	F16H11.5	nhr-45	Nuclear Hormone Receptor family	73.53	568.74	7.735	0.000153242
191219_at	Y41C4A.11			90.75	694.45	7.652	0.0130013
188698_s_at	T28C12.5		esterase	205.37	1560.28	7.597	0.00373037
176004_at	M02H5.4	nhr-202	Nuclear Hormone Receptor family	68.14	514.82	7.555	0.000382278
179933_at	F39E9.1			10.37	77.73	7.496	0.00847443
189660_at	F59D6.3			62.13	464.33	7.474	0.0119795
189628_at	R01E6.3	cah-4	Carbonic AnHydrase	482.09	3579.16	7.424	0.000106174
182660_at	W02G9.2	kel-8	KELch-repeat containing protein	118.32	873.69	7.384	3.65141e-05
189385_s_at	C29F7.3			241.22	1780.99	7.383	0.000119383
172241_x_at	C37A5.8			4.39	32.38	7.376	0.00182816
188697_at	T28C12.4		esterase	196.43	1439.64	7.329	0.000605425
174021_at	F16H11.5	nhr-45	Nuclear Hormone Receptor family	40.35	291.27	7.219	0.00701499
179914_at	F35E12.8			30.95	220.8	7.134	0.0109678
180810_at	R10D12.9			51.67	368.16	7.125	0.00182788
189915_s_at	B0365.6	clec-41	C-type LECtin	143.21	993.72	6.939	0.00958878
172252_x_at	H25K10.4			4.53	31.41	6.934	0.00961414
180612_s_at	F53A9.8			870	5974.58	6.867	0.000206915
189755_at	W01A11.1			1050.96	7053.84	6.712	0.00119275
174132_at	C38H2.2			4.89	32.13	6.571	0.00577678
185557_s_at	C02A12.4	lys-7	LYSozyme	647.35	4240.59	6.551	0.0231075
178448_at	C03D6.1			21.35	139.41	6.53	0.000245992
183449_s_at	F45H10.4			63.98	395.51	6.182	0.00103755
190917_at	C53B4.7	bre-1	BT (Bacillus thuringiensis) toxin REsistant	106.37	648.81	6.1	0.00124531
175194_at	Y37E11AR.5	ugt-45	UDP-GlucuronosylTransferase	11.48	67.87	5.912	0.000571533
178927_at	K08D8.5			9.02	53.07	5.884	0.0205804
193914_at	M05D6.7	gbh-2	Gamma Butyrobetaine Hydroxylase	89.64	525.16	5.859	9.74093e-05
192634_at	ZC410.1	nhr-11	Nuclear Hormone Receptor family,	15.94	93.28	5.852	0.00010177
180035_s_at	C44C8.1			101.83	589.81	5.792	0.000312444
188156_at	C52A10.1			89.47	512.18	5.725	0.0079812
189975_at	F08H9.5			23.47	131.9	5.62	0.0247368
172984_s_at	W02G9.2	kel-8	KELch-repeat containing protein	214.25	1201.63	5.609	8.25014e-05
190009_at	F49E12.10			7.84	43.69	5.573	0.0213709
189851_at	C47D2.2	cdd-1	CytiDine Deaminase	110.01	612.91	5.571	8.56178e-05
191017_at	Y40D12A.2			333.14	1840.37	5.524	0.00188023
177469_at	D1053.3			4.69	25.87	5.516	0.00784041
187013_at	Y77E11A.2			31.73	173.17	5.458	0.00199415
179373_at	C50F4.9			18.17	98.27	5.408	0.000102336
175975_at	M02H5.3	nhr-201	Nuclear Hormone Receptor family	5.16	27.85	5.397	0.0147716
189672_at	C17H12.4			105.9	549.02	5.184	0.00591533
184504_s_at	Y73C8B.3			102.94	533.17	5.179	0.00107867
174073_at	F09E10.11		miscRNA	809.89	4192.3	5.176	0.00149074
188085_s_at	R09H10.4	ptr-14	PaTched Related family	21.88	112.44	5.139	0.000300947
189904_at	F08H9.7	clec-56	C-type LECtin	845.09	4317.44	5.109	0.000247746
189671_at	C50H11.15	cyp-33C9	CYtochrome P450 family	42.13	209.03	4.962	0.0103571
184845_at	F53E10.1			605.87	2945.4	4.861	0.00484489
179758_at	K02D7.5			4.63	22.5	4.86	0.0112141
180540_at	C42D4.3			4.4	21.11	4.798	0.00279764
174655_at	Y59H11AR.2			38.73	184.61	4.767	0.00055437
173257_s_at	Y53F4B.45		Dauer-upregulated	34.48	164.18	4.762	0.00389852
189031_at	F44E7.8	nhr-142	Nuclear Hormone Receptor family	8.5	40.41	4.754	0.0169836
181855_at	F58A6.1			239.22	1125.35	4.704	0.0071022
190590_s_at	C54D1.4	alh-10	ALdehyde deHydrogenase	27.34	127.9	4.678	0.000770282
190682_at	F10D2.2	ugt-39	UDP-GlucuronosylTransferase	37.36	171.46	4.589	0.00691684
183452_s_at	Y32F6B.1			54.37	249.07	4.581	0.0124598
176222_at	Y82E9BL.10	fbxa-14	F-box A protein	43.15	192.09	4.452	0.00282591
180562_at	B0218.8	clec-52	C-type LECtin	444.22	1946.64	4.382	0.0121437
179110_at	C39E9.8			253.94	1092.96	4.304	3.00719e-06
189690_s_at	T14G8.3			198.58	843.09	4.246	0.00122812
183115_at	C34H4.2			18.01	76.11	4.226	0.0220011
190172_at	T12C9.6	nhr-16	Nuclear Hormone Receptor family	14.48	61.13	4.222	0.0120325
189041_s_at	T21E8.1			13.55	56.84	4.195	0.003485
185645_s_at	F15B10.1			1003.3	4192.94	4.179	0.000272939
189460_at	B0285.9	ckb-2	Choline Kinase B	269.1	1118.88	4.158	0.00597116
183815_at	F21E9.3			24.98	103.56	4.146	0.000191481
186941_at	F54H5.4	mua-1	MUscle Attachment abnormal	53.47	221.13	4.136	0.000402878
184107_at	K09D9.1			8.92	35.47	3.976	0.0211936
186597_at	F19C6.5			6.24	24.48	3.923	0.00303169
185273_at	E02C12.8			13.28	51.64	3.889	0.00783858
182815_at	T24C4.4			16.1	61.93	3.847	1.25674e-05
182464_s_at	C55B6.2	dnj-7	DNaJ domain (prokaryotic heat shock protein)	75.58	288.7	3.82	0.000464082
189948_at	T01G6.2	nhr-131	Nuclear Hormone Receptor family	22.88	86.09	3.763	0.00271967
180342_at	F35E12.6			685.86	2566.73	3.742	0.000186419
189403_s_at	F14F4.3	mrp-5	Multidrug Resistance Protein family	183.9	682.11	3.709	0.00108099
180665_at	D2021.4			15.83	58.59	3.701	0.000405474
177317_at	VC5.3	npa-1	Nematode Polyprotein Allergen related	2166.24	7998.98	3.693	0.00512721
172793_x_at	T10H4.12	cpr-3	Cysteine PRotease related	109.03	399.3	3.662	0.0232457
184002_at	C09F12.1	clc-1	CLaudin-like in Caenorhabditis	218.52	796.96	3.647	0.00154754
182292_at	Y87G2A.4	aex-6	Aboc, EXpulsion defective	19.73	71.94	3.646	0.00154209
173274_s_at	W01F3.2			165.79	599.91	3.618	2.44851e-06
192992_at	Y51A2D.13			278.76	1007.33	3.614	0.0219558
187222_at	D1044.1			30.32	109.55	3.613	0.0154852
174713_at	F14F4.3	mrp-5	Multidrug Resistance Protein family	953.34	3438.25	3.607	0.000860952
189358_at	T10B10.8			44.84	161.73	3.607	0.00397321
191440_at	R04B5.9			835.19	2997.07	3.588	0.00118056
177368_at	M60.2			1336.62	4789.19	3.583	0.00930288
177978_at	F58G1.4			2013.96	7210.72	3.58	9.88929e-05
191718_s_at	C43C3.1	ifp-1	Intermediate Filament Protein, class E	14.02	50.08	3.572	0.012079
192441_s_at	F13B10.1	tir-1	TIR (Toll and Interleukin 1 Receptor) domain protein	57.8	202.87	3.51	0.000491497
194157_s_at	F53B6.8			4.51	15.82	3.508	0.00638549
177375_at	M60.2			1228.98	4295.93	3.496	0.00203866
188201_at	F16F9.4			10.72	37.36	3.485	0.0101885
177817_at	W01F3.2			323.1	1125.64	3.484	1.62159e-05
173550_at	F45D3.4			99.57	345.99	3.475	0.00257718
193200_s_at	C47B2.6			1181.21	4088.87	3.462	0.000105062
176826_at	Y40B10A.2			77.12	265.01	3.436	0.00194829
184003_s_at	C09F12.1	clc-1	CLaudin-like in Caenorhabditis	161.87	555.89	3.434	0.0029996
174330_at	ZC506.3	pssy-1	PhosphatidylSerine SYnthase	34.47	116.77	3.388	0.0201036
174347_s_at	C49C8.5			65.83	222.3	3.377	0.0117887
183089_at	C15C7.5			245.85	823.91	3.351	0.000241597
186886_s_at	Y18D10A.23			152.29	509.1	3.343	0.000578046
186216_at	Y95B8A.6			9.09	30.36	3.34	0.00779622
189413_at	E03E2.1	cyp-43A1	CYtochrome P450 family	101.48	338.84	3.339	0.0113263
178017_s_at	F01D5.1			9.33	30.87	3.309	0.000672797
190281_at	W01A11.4	lec-10	gaLECtin	2296.07	7578.24	3.301	0.00468222
188405_at	F40F4.4	lbp-3	Lipid Binding Protein	492.98	1626.24	3.299	0.0057268
172773_x_at	T04A11.11	nhr-88	Nuclear Hormone Receptor family	18.53	60.88	3.285	4.0197e-05
172773_x_at	ZC239.1	nhr-88	Nuclear Hormone Receptor family	18.53	60.88	3.285	4.0197e-05
189100_at	ZK896.6			122.34	401.35	3.281	0.00619833
176051_s_at	Y41D4B.8	nhr-92	Nuclear Hormone Receptor family	90.55	295.87	3.267	0.000694167
184558_at	Y45F10A.5	nlp-17	Neuropeptide-Like Protein	30.92	100.76	3.259	0.000427824
193267_at	F13D11.1			108.27	351.86	3.25	0.000702453
182836_at	C29G2.6			230.14	747.56	3.248	0.000263754
194060_s_at	T01D3.6			324.75	1050.02	3.233	0.0184078
188474_s_at	C14B9.2			435.22	1405.67	3.23	0.00173755
192578_at	F10D2.9	fat-7	FATty acid desaturase	415.74	1340.43	3.224	0.0103776
179272_at	C06B3.6			1214.75	3903	3.213	0.00433084
187935_s_at	F44F4.4	ptr-8	PaTched Related family	31.34	100.54	3.208	0.00525234
175170_s_at	ZK6.10	dod-19	Downstream Of DAF-16 (regulated by DAF-16)	117.78	375.37	3.187	0.0135101
192474_s_at	C31C9.2			183.58	581.08	3.165	0.000165882
183440_s_at	R09A1.3			61.55	194.5	3.16	0.00288887
172069_x_at	T10H4.12	cpr-3	Cysteine PRotease related	81.5	257.38	3.158	0.0226801
173008_s_at	T04A11.11	nhr-88	Nuclear Hormone Receptor family	55.1	173.77	3.154	0.0161343
173008_s_at	ZC239.1	nhr-88	Nuclear Hormone Receptor family	55.1	173.77	3.154	0.0161343
178357_at	ZK520.2			82.86	260.35	3.142	0.000321088
172403_x_at	F36H5.2	math-27	MATH (meprin-associated Traf homology) domain containing	68.92	215.4	3.125	0.00152011
194023_s_at	T07C5.1	ugt-50	UDP-GlucuronosylTransferase	64.59	201.54	3.12	0.00920634
181587_at	R01H10.4			44.58	138.67	3.111	0.000957831
189767_at	R05F9.6			4481.93	13901.7	3.102	3.6807e-05
185357_at	Y37D8A.16			160	495.7	3.098	0.000393158
191802_at	ZC506.3	pssy-1	PhosphatidylSerine SYnthase	118.48	366.53	3.094	0.00190991
178452_s_at	F54B8.3	fbxa-69	F-box A protein	37.62	116.31	3.092	0.0259859
172236_x_at	T24F1.5			44.93	138.59	3.085	0.00441578
174823_at	K02A4.1	bcat-1	Branched Chain AminoTransferase	2165.36	6651.79	3.072	0.000280111
186959_at	T07A5.1			13.58	41.69	3.07	0.00687807
179607_at	C18E9.9			226.17	685.79	3.032	0.000156537
178813_at	C47B2.8	prx-11	PeRoXisome assembly factor	126.13	380.96	3.02	9.2523e-05
184393_at	C33H5.13			381.96	1150.37	3.012	0.000945654
186903_at	Y55B1BL.1			48.58	146.01	3.006	0.00324111
191331_at	Y53F4B.31	gst-28	Glutathione S-Transferase	115.93	38.63	-3.00104	0.0159283
188214_at	T01B10.1	grd-4	hedgehog-like family	33.15	10.89	-3.04408	0.00624403
193837_at	C12C8.2			185.58	60.79	-3.0528	0.00279097
173919_s_at	C56A3.2	ttr-44		1652.66	533.57	-3.09736	0.000493641
190221_at	F07A5.3		membrane glycoprotein	99.32	31.99	-3.10472	0.00708372
180814_s_at	F09B12.3			560.37	177.48	-3.15737	0.00836996
186443_at	F42A10.7			4246.05	1318.42	-3.22056	0.022358
175238_s_at	EGAP2.3	pho-1	intestinal acid PHOsphatase	359.84	110.08	-3.2689	0.00952326
173388_s_at	F09B12.3			280.42	84.67	-3.31192	0.0159896
180424_at	F15E6.3			353.09	104.33	-3.38436	0.00168616
190598_at	T14B4.4	tsp-10	TetraSPanin family,	98.89	29.19	-3.3878	0.001413
172437_x_at	R09B5.3	cnc-2	CaeNaCin	1174.15	341.41	-3.43912	0.00486795
173609_at	Y39B6A.1			7032.4	2013.51	-3.49261	0.00168043
189534_at	F55F3.2b		Carboxylesterases	159.24	44.46	-3.58165	0.00016742
192650_at	F09E10.3	dhs-25	Short-chain DeHydrogenases	1309.63	358.85	-3.64952	0.00139146
183010_s_at	C24B9.3			4617.21	1245.99	-3.70566	0.00153003
177868_s_at	T28F3.8			570.82	152.91	-3.73305	0.000297938
175591_s_at	C24B9.3			2787.3	722.24	-3.85924	0.000581163
183367_at	M02D8.5			137.51	35.31	-3.89436	0.00644097
190786_s_at	Y16B4A.2		serine carboxypeptidase	704.87	179.97	-3.9166	0.0013879
192504_at	T22H6.2			117.01	29.69	-3.94106	0.000279826
172511_x_at	T28F3.8			275.47	66.04	-4.17126	0.000237864
185554_s_at	Y39B6A.1			20228.1	4820.88	-4.19593	0.00067192
175512_s_at	C12C8.2			114.42	27.12	-4.21903	0.00231173
173051_s_at	F22A3.6			31995.2	7456.03	-4.29119	0.000171256
191917_at	28F3.4			297.68	69.38	-4.29057	0.000307854
178236_s_at	F58B3.1	lys-4	LYSozyme	12904.6	2973.79	-4.33946	0.000197173
174283_s_at	F38B6.4			331.09	73.44	-4.50831	0.00396587
172400_x_at	F22A3.6			30354	6449.31	-4.70656	0.000277836
194255_x_at	F22A3.6			32225.5	6812.28	-4.73051	0.00062547
185646_at	T01B10.2	grd-14	hedgehog-like family	81.32	16.72	-4.86364	0.00261706
190094_s_at	M02D8.4			1841.67	372.04	-4.95019	1.11248e-05
193838_s_at	W04E12.6	clec-49	C-type lectin	848.01	170.28	-4.98009	0.000358784
188162_at	C09H5.2		ATPas	142.05	27.52	-5.1617	5.51922e-08
187180_at	C44C1.5			107.04	20.6	-5.19612	0.00605046
188660_s_at	F28A12.4		peptidase,	5647.04	1010.71	-5.5872	2.68529e-05
189921_at	C05C10.4		acid phosphatase	3393.76	601.63	-5.64094	0.00165272
182519_at	F20D6.5			65.74	9.81	-6.70133	0.0118311
193213_at	F37B4.2	ifc-1	Intermediate Filament	323.88	47.96	-6.75313	0.00744981
181156_at	T08A9.8	spp-4	Saposin-like protein family	829.64	123.19	-6.73464	0.00112169
177428_at	F58G6.7			154.96	22.69	-6.82944	0.0067114
180946_at	C45G7.3	ilys-3		81.82	11.71	-6.98719	0.00945726
178087_s_at	F58B3.2	lys-5	LYSozyme	97.05	13.54	-7.16765	0.00235699
185270_at	F53E10.4			69.83	9.2	-7.59022	0.00168677
176939_at	Y34D9A.11	spp-23	Saposin-like protein family	950.11	118.75	-8.00093	0.00267096
173996_at	C17C3.12, C17C3.18	ins-13, acdh-2	Acyl CoA DeHydrogenase	128.8	15.63	-8.24056	0.000823094
178149_s_at	T07C4.4	spp-1	Saposin-like protein family	2967.49	357.1	-8.30997	0.00133446
192528_at	C35A5.3			270.36	30.87	-8.75802	0.00126114
190705_s_at	C17C3.12	acdh-2	Acyl CoA DeHydrogenase,	756.32	81.76	-9.25049	4.71735e-05
181259_at	B0218.6	clec-51	C-type lectin	221.84	24.02	-9.23564	0.00296491
180913_at	F32A5.5	aqp-1	aquaporin or aquaglyceroporin related	571.88	58.18	-9.82949	0.00617023
187996_s_at	F28H7.3		lipase,	1940.49	190.11	-10.2072	0.0137426
190499_s_at	C35D10.14	clec-5	C-type lectin	122.51	11.19	-10.9482	0.0127114
180669_s_at	Y4C6B.6			567.39	51.17	-11.0883	0.0210682
178409_s_at	F58B3.3	lys-6	lysozyme	165.71	12.29	-13.4833	2.00487e-05
186239_at	T03F1.10	clec-53	C-type lectin	177.16	13.01	-13.6172	0.0053623
191303_at	Y53F4B.32	gst-29	Glutathione S-Transferase	151.76	10.42	-14.5643	3.06215e-05
184456_at	H17B01.3			96.01	6.62	-14.503	0.0027063
183330_s_at	C09B8.4			422.2	25.02	-16.8745	0.00450534
177104_at	Y46C8AL.3	clec-70	C-type lectin	239.01	12.24	-19.527	0.0120436
171769_x_at	F23F12.12			770.54	37.74	-20.4171	0.000430906
186492_s_at	F15E11.14			31708	1344.6	-23.5818	4.71086e-05
188975_at	C15A11.7			244.75	7.94	-30.8249	0.00595719
180945_s_at	F49C12.7			653.03	12.17	-53.659	0.0102335
177131_s_at	Y19D10B.7			23521.9	341.83	-68.8116	0.000776964
177920_at	D1086.3			1163.01	8.28	-140.46	0.000127004
186519_at	F15E11.12			1976.5	6.56	-301.296	0.0150912
UPREGULATED
Affy transcripts		293
genes Duplicates		24
Unique genes		269
DOWNREGULATED
Affy transcripts		67
genes duplicated		5
Unique genes		62
